# Supplementary material
Source: HighWire-hosted journal article supplement (https://bmjopenquality.bmj.com/highwire/filestream/145606/field_highwire_adjunct_files/2/bmjoq-2022-002211supp003_data_supplement.pdf)
Supplement: bmjoq-2022-002211supp003_data_supplement.pdf [file bmjoq-2022-002211supp003_data_supplement.pdf]

## Supplemental Figure 2.

A

Form Viewer
Ames, Meredith

TEST, Dummy (19M)
MRN: 4489747
1 Editing

### Ambulatory Medication Reconciliation

**Patient Demographics**

|            |            |            |                                    |
|------------|------------|------------|------------------------------------|
| MRN        | 4489747    | HC Number  |                                    |
| First Name | Dummy      | Address    | 234 batjirst, TORONTO, ON, M5T 2S8 |
| Last Name  | Test       | Home Phone |                                    |
| Name       |            |            |                                    |
| DOB        | 2000-03-29 |            |                                    |
| Gender     | male       |            |                                    |

**Allergies**

| Category | Allergen | Reaction |
|----------|----------|----------|
|          |          |          |

**Medication Flowsheet**

<< oldest < prev 1-0/0 next > latest >>

**BPMH**

Skip BPMH
Preview Note
Sign-off BPMH

Active Medications

| Medication Name                                               | Dosage | Unit | Route | Frequency | Purpose | Comments | Discontinue |
|---------------------------------------------------------------|--------|------|-------|-----------|---------|----------|-------------|
| <span style="font-size: small; color: #666;">+ Add Row</span> |        |      |       |           |         |          |             |

BPMH Comments

B

**BPMH**

Skip BPMH
Preview Note
Sign-off BPMH

Active Medications

| Medication Name                                               | Dosage  | Unit | Route          | Frequency               | Purpose                 | Comments                                                   | Discontinue |
|---------------------------------------------------------------|---------|------|----------------|-------------------------|-------------------------|------------------------------------------------------------|-------------|
| Acetaminophen                                                 | 325-500 | mg   | orally         | every 4 hours as needed | headache/fever          | advised patient to take temperature prior to administering | Discontinue |
| Filgrastim                                                    | 300     | mcg  | subcutaneously | once daily              | stimulate immune system | for 7 days starting day 14                                 | Discontinue |
| <span style="font-size: small; color: #666;">+ Add Row</span> |         |      |                |                         |                         |                                                            |             |

BPMH Comments
